# Supplementary material
Source: publisher figshare collection journal article supplement (https://frontiersin.figshare.com/ndownloader/files/21697890)
Supplement: Supplementary file [file 21697890]

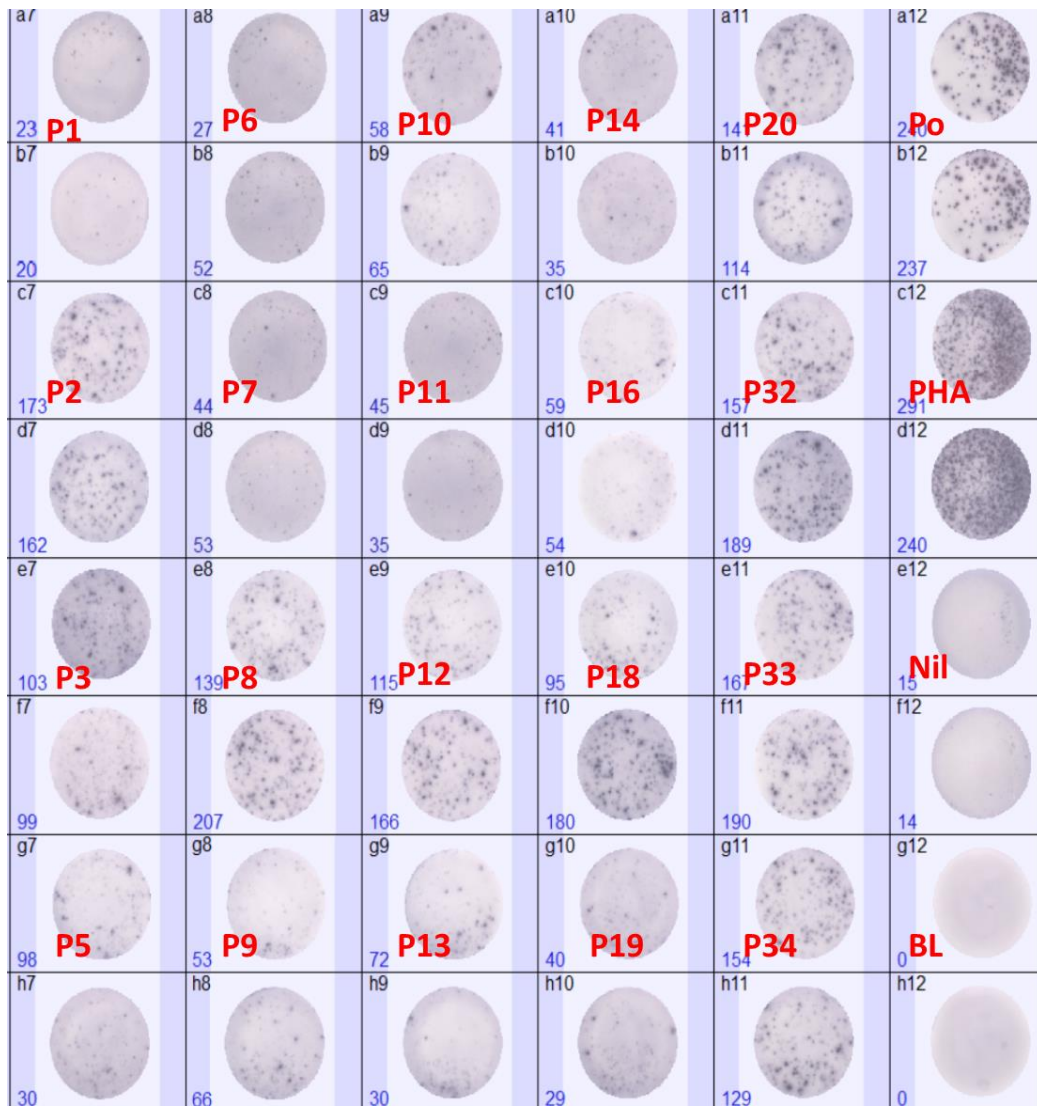

**Supplementary figure 1:** An example of an cultured ELISpot assays, outlining the plate set up and responses to each of the 20 peptides and the positive control (PHA) and the negative control (Nil)
